# Supplementary material
Source: publisher figshare collection journal article supplement (https://acs.figshare.com/ndownloader/files/9110269)
Supplement: Supplementary file 1 [file 9110269]

## **Supporting Information**

### **Tumor-Associated Mutations in Caspase-6 Negatively Impact Catalytic Efficiency**

**Kevin B. Dagbay, Maureen E. Hill, Elizabeth Barrett, and Jeanne A. Hardy\***

Department of Chemistry, University of Massachusetts Amherst

Running title: Caspase-6 Tumor-Associated Mutations

\*To whom correspondence should be addressed: Jeanne A. Hardy, PhD, Department of Chemistry, University of Massachusetts Amherst, 745A Lederle Graduate Research Tower, 710 North Pleasant St., Amherst, MA 01003; E-mail: [hardy@chem.umass.edu](mailto:hardy@chem.umass.edu),  
Phone: (413) 545-3486, Fax: (413) 545-4490

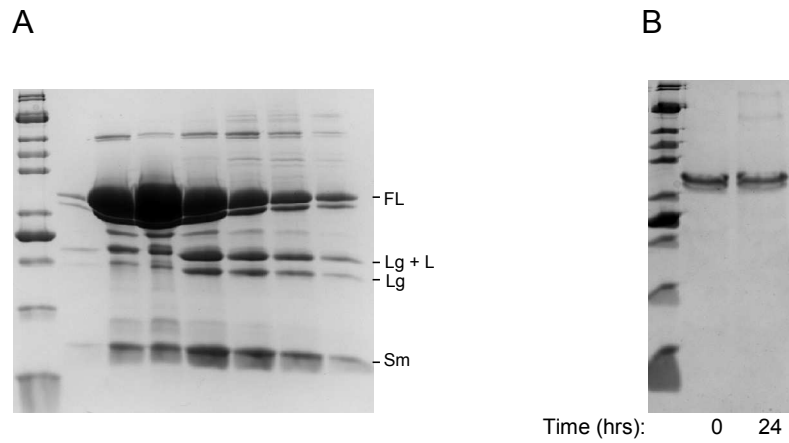

Figure S1. (A) Purification gel of caspase-6 FL W227A. Even after 18-hr expression, it is predominantly in its unprocessed, inactive form. (B) Self-cleavage assay of caspase-6 FL W227A (3  $\mu$ M) before and after 24 hour incubation at 37°C. Even after 24 hours, it cannot cleave itself any further.
